# Supplementary material for: Effect of Vitamin D and Docosahexaenoic Acid Co-Supplementation on Vitamin D Status, Body Composition, and Metabolic Markers in Obese Children: A Randomized, Double Blind, Controlled Study
Source: MDPI journal article supplement (doi:10.3390/nu14071397), 2022-03-27
Supplement: s1 [file s1]

Supplementary Materials

# Effect of Vitamin D and Docosahexaenoic Acid Co-Supplementation on Vitamin D Status, Body Composition, and Metabolic Markers in Obese Children: A Randomized, Double Blind, Controlled Study

Valentina De Cosmi <sup>1</sup>, Alessandra Mazzocchi <sup>1</sup>, Veronica D'Oria <sup>2</sup>, Alessandro Re <sup>3</sup>, Giulia Carla Immacolata Spolidoro <sup>1</sup>, Gregorio P. Milani <sup>1,4,\*</sup>, Cristiana Berti <sup>4</sup>, Silvia Scaglioni <sup>5</sup>, Claudia Giavoli <sup>1,6</sup>, Silvia Bergamaschi <sup>6</sup>, Giulia Rodari <sup>6</sup>, Eriselda Profka <sup>6</sup>, Roberto Colombo <sup>3</sup> and Carlo Agostoni <sup>1,7</sup>

**Table S1.** Median (IQR) clinical and anthropometric variables in the total groups of patients who completed the study and in the drop-outs group at baseline.

| Total population | Patients who completed the study |      | Drop-out |      | p-value |
|------------------|----------------------------------|------|----------|------|---------|
|                  | Median                           | IQR  | Median   | IQR  |         |
| Age, years       | 11.2                             | 3.2  | 8.7      | 3.8  | 0.000*  |
| SDS BMI          | 2.6                              | 0.6  | 2.6      | 0.6  | 0.883   |
| FM, %            | 35.3                             | 7.4  | 36.4     | 7.5  | 0.553   |
| FFM, kg          | 36.9                             | 10.9 | 37.9     | 13.6 | 0.901   |
| 25OHD            | 14.4                             | 8.0  | 15.2     | 5.6  | 0.499   |

\*Mann-Whitney test  $p < 0.05$ . IQR = interquartile range; FM = fat mass; FFM = fat free mass; SDS = standard deviation score; 25OHD = 25-hydroxy vitamin D.

**Table S2.** Median (IQR) clinical and anthropometric variables of patients who completed the study and of the drop-outs patients in vitamin D +DHA group at baseline.

| Vitamin D + DHA group | Patients who completed the study |      | Drop-out |      | p-value |
|-----------------------|----------------------------------|------|----------|------|---------|
|                       | Median                           | IQR  | Median   | IQR  |         |
| Age, years            | 11.1                             | 2.5  | 8.7      | 4.1  | 0.007*  |
| SDS BMI               | 2.6                              | 0.6  | 2.6      | 0.8  | 0.752   |
| FM, %                 | 34.4                             | 6.4  | 36.0     | 8.7  | 0.383   |
| FFM, kg               | 37.3                             | 11.0 | 35.7     | 13.3 | 0.605   |
| 25OHD                 | 14.0                             | 6.8  | 15.0     | 6.0  | 0.542   |

\*Mann-Whitney test  $p < 0.05$ . IQR = interquartile range; FM = fat mass; FFM = fat free mass; SDS = standard deviation score; 25OHD = 25-hydroxy vitamin D.

**Table S3.** Median (IQR) clinical and anthropometric variables of patients who completed the study and of the drop-outs patients in vitamin D group at baseline.

| Vitamin D group | Patients who completed the study |      | Drop-out |      | <i>p</i> -value |
|-----------------|----------------------------------|------|----------|------|-----------------|
|                 | Median                           | IQR  | Median   | IQR  |                 |
| Age, years      | 11.6                             | 3.7  | 9.0      | 4.2  | 0.021*          |
| SDS BMI         | 2.6                              | 0.7  | 2.6      | 0.7  | 0.968           |
| FM, %           | 21.0                             | 10.5 | 23.1     | 14.8 | 0.873           |
| FFM, kg         | 36.5                             | 11.1 | 40.2     | 19.7 | 0.766           |
| 25OHD           | 15.3                             | 8.4  | 15.7     | 4.1  | 0.582           |

\*Mann-Whitney test  $p < 0.05$ . IQR = interquartile range; FM = fat mass; FFM = fat free mass; SDS = standard deviation score; 25OHD = 25-hydroxy vitamin D.

We found that the only differences between drop-outs and the patients who completed the study (in the total group, and in each group) was related to age, but it was not clinically relevant.
